# Supplementary material for: Solution-processed small molecules with ethynylene bridges for highly efficient organic solar cells
Source: Royal Society of Chemistry journal article supplement (doi:10.1039/c6ta04442e), 2016-01-01
Supplement: c6ta04442e1.pdf [file c6ta04442e1.pdf]

## Supporting information

### **Solution-processed small molecules with ethynylene bridges for highly efficient organic solar cells**

Yuanyuan Kan,<sup>a</sup> Chang Liu,<sup>a</sup> Lianjie Zhang,<sup>a</sup> Ke Gao,<sup>a</sup> Feng Liu,<sup>\*b</sup>

Junwu Chen<sup>\*a</sup> and Yong Cao<sup>a</sup>

*<sup>a</sup>Institute of Polymer Optoelectronic Materials & Devices, State Key Laboratory of Luminescent Materials & Devices, South China University of Technology, Guangzhou 510640, China*

*<sup>b</sup> Materials Sciences Division, Lawrence Berkeley National Laboratory, Berkeley, California 94720, United States*

*\*Correspondence - psjwchen@scut.edu.cn*

## Contents

Figure S1.  $^1\text{H}$  NMR and  $^{13}\text{C}$  NMR spectra of compound **2** in  $\text{CDCl}_3$ .

Figure S2.  $^1\text{H}$  NMR and  $^{13}\text{C}$  NMR spectra of compound **3** in  $\text{CDCl}_3$ .

Figure S3.  $^1\text{H}$  NMR (a) and  $^{13}\text{C}$  NMR (c) spectra of DPP-E-BDT in  $\text{CDCl}_3$ .  $^1\text{H}$  NMR spectrum (b) of the sample after exposure to the light and air for two months.

Figure S4.  $^1\text{H}$  NMR (a) and  $^{13}\text{C}$  NMR (c) spectra of DPP-E-BDT-T in  $\text{CDCl}_3$ .  $^1\text{H}$  NMR spectrum (b) of the sample after exposure to the light and air for two months.

Figure S5. Mass (MALDI-TOF) spectrum of DPP-E-BDT.

Figure S6. Mass (MALDI-TOF) spectrum of DPP-E-BDT-T.

Figure S7. SCLC  $J^{1/2}$ - $V$  characteristics of DPP-E-BDT and DPP-E-BDT-T based active layers in hole-only (a) and electron-only (b) devices. Hole-only device: ITO/PEDOT:PSS/active layer/ $\text{MoO}_3$ /Al; electron-only device: ITO/ $\text{ZnO}$ /active layer/PFN/Al.

Table S1. Photovoltaic performances of the OSCs with different D:A ratios, based on the as-cast active layer films.

Table S2. Comparison of photovoltaic performances of the OSCs based on active layers fabricated with chlorobenzene or  $\text{CHCl}_3$  as the solvent, where 0.4 v% DIO and thermal annealing at 100 °C for 10 min were applied.

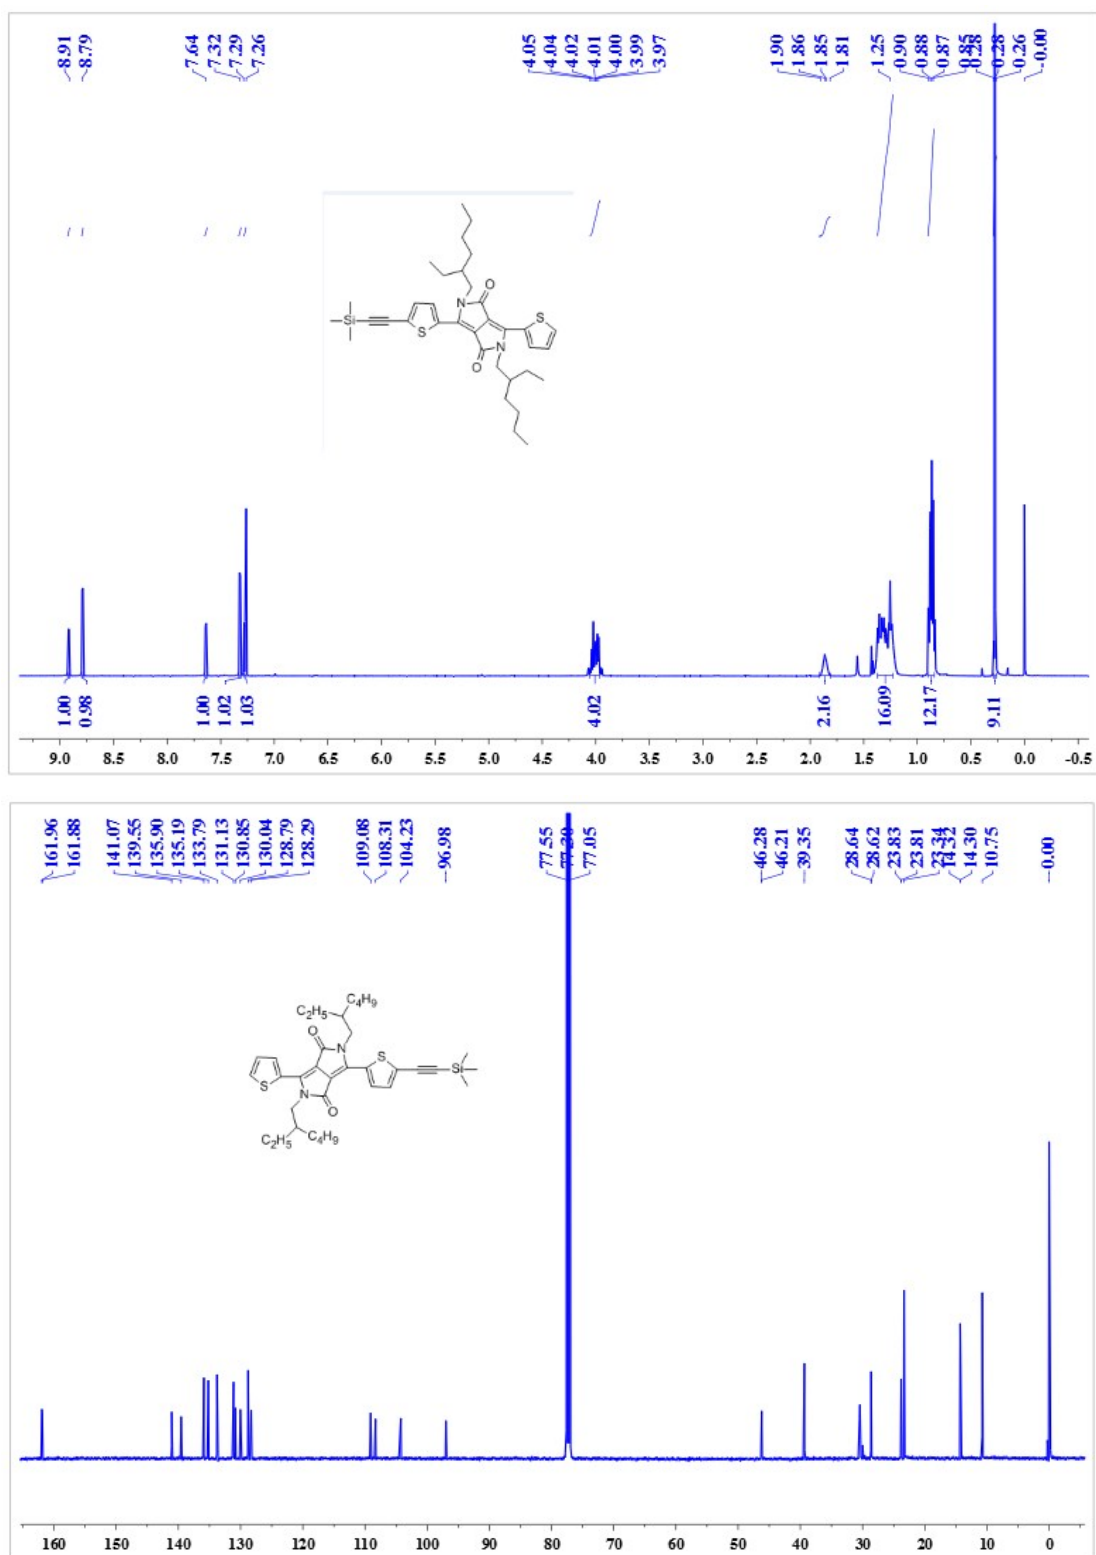

Figure S1. <sup>1</sup>H NMR and <sup>13</sup>C NMR spectra of compound **2** in CDCl<sub>3</sub>.

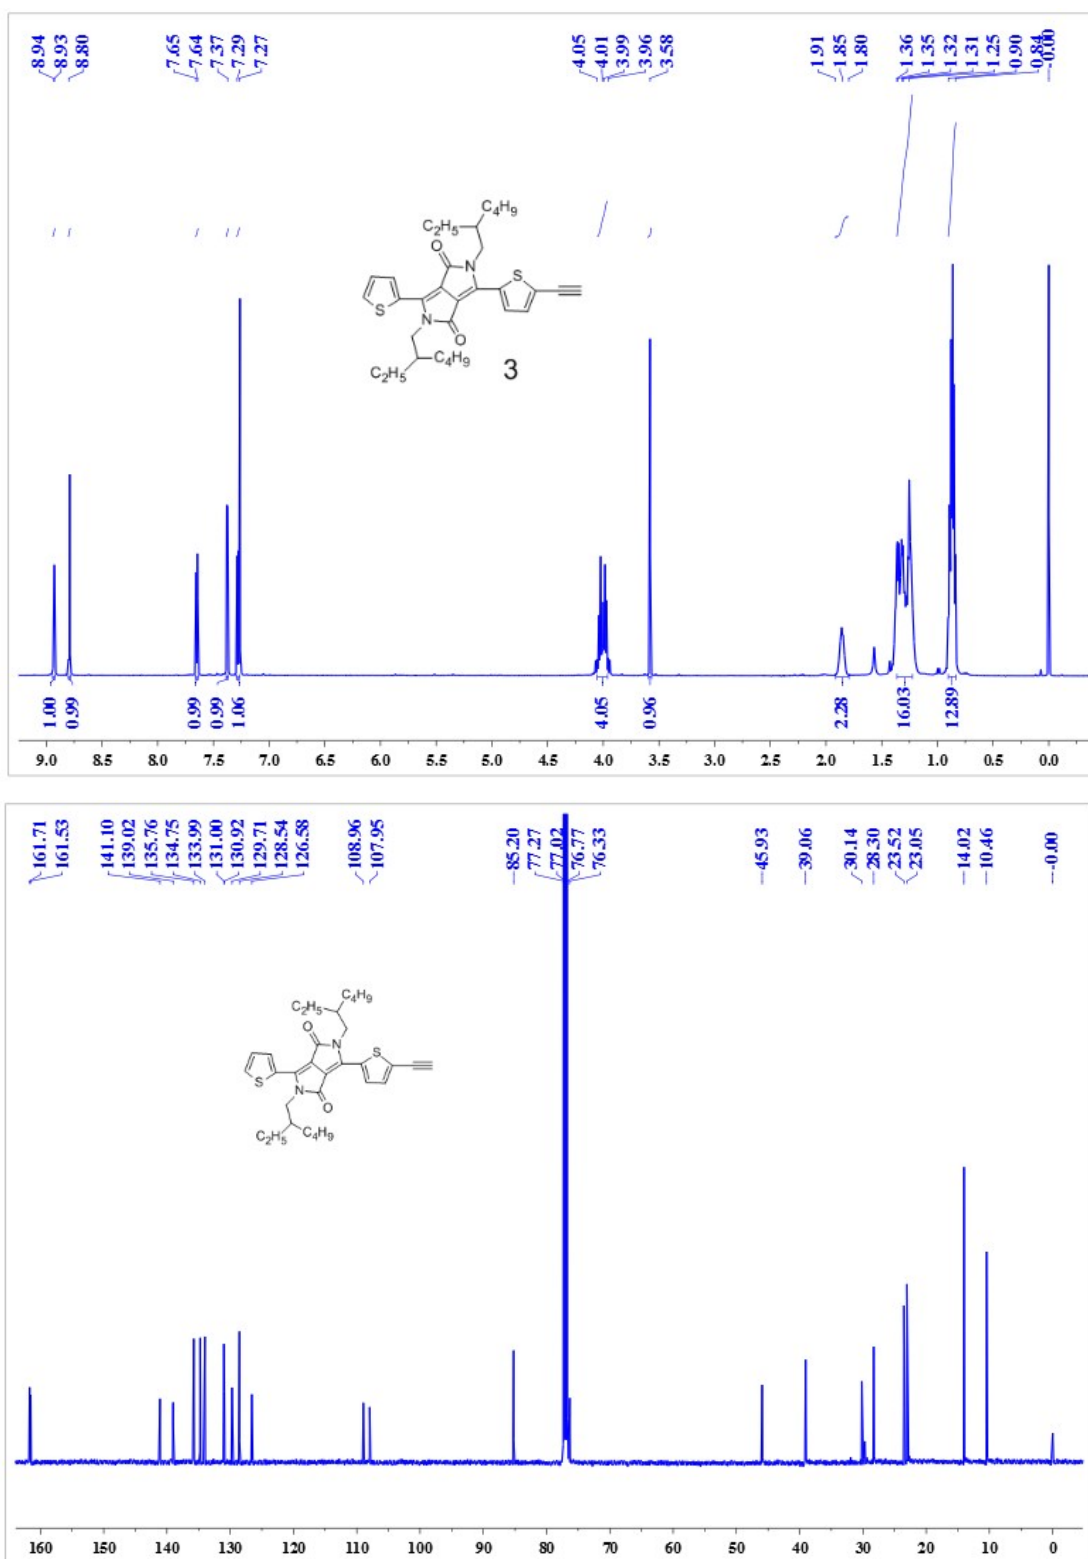

Figure S2. <sup>1</sup>H NMR and <sup>13</sup>C NMR spectra of compound 3 in CDCl<sub>3</sub>.

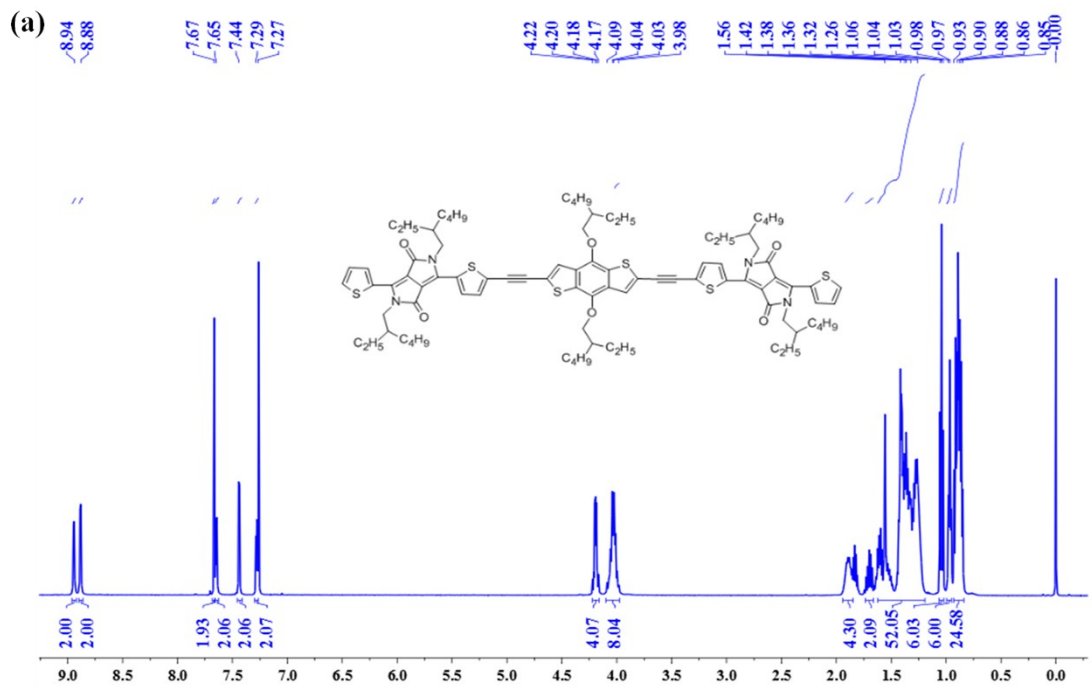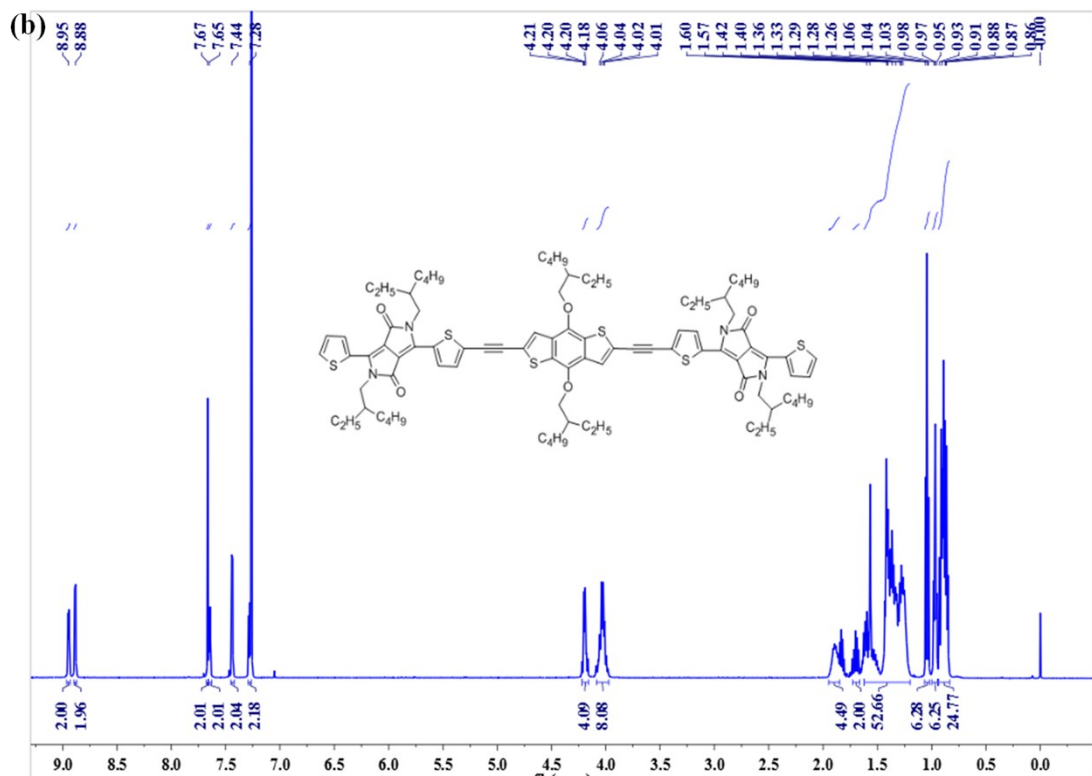

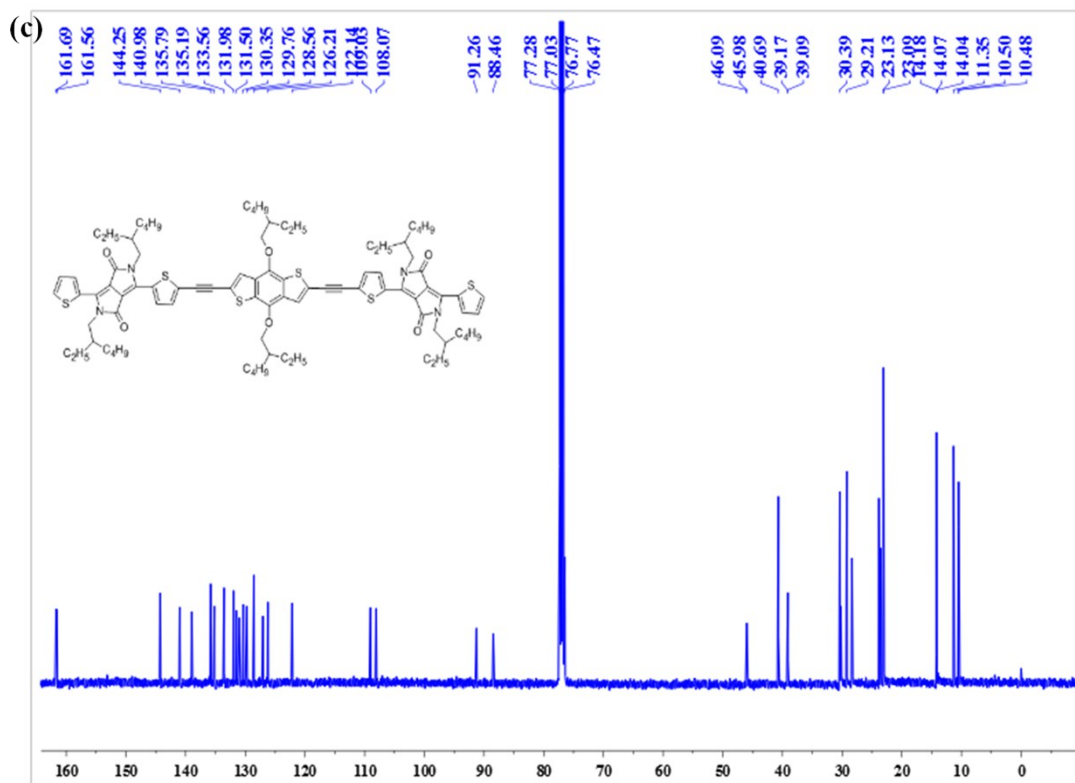

Figure S3. <sup>1</sup>H NMR (a) and <sup>13</sup>C NMR (c) spectra of DPP-E-BDT in CDCl<sub>3</sub>. <sup>1</sup>H NMR spectrum (b) of the sample after exposure to the light and air for two months.

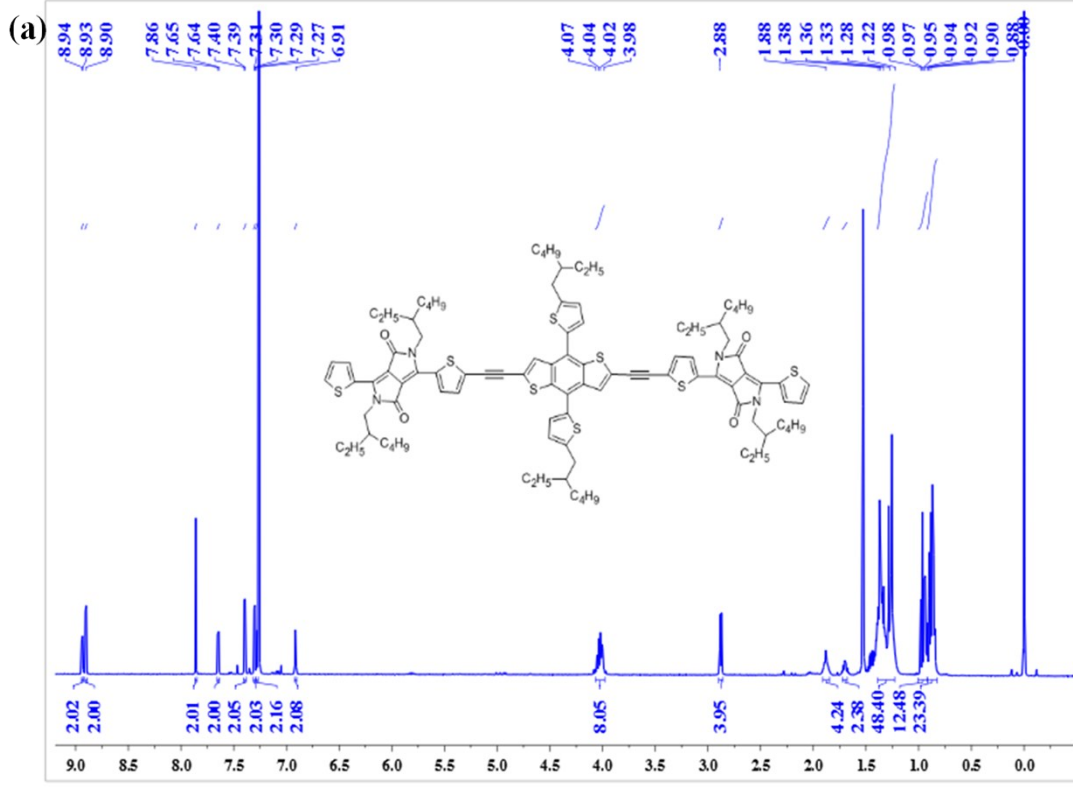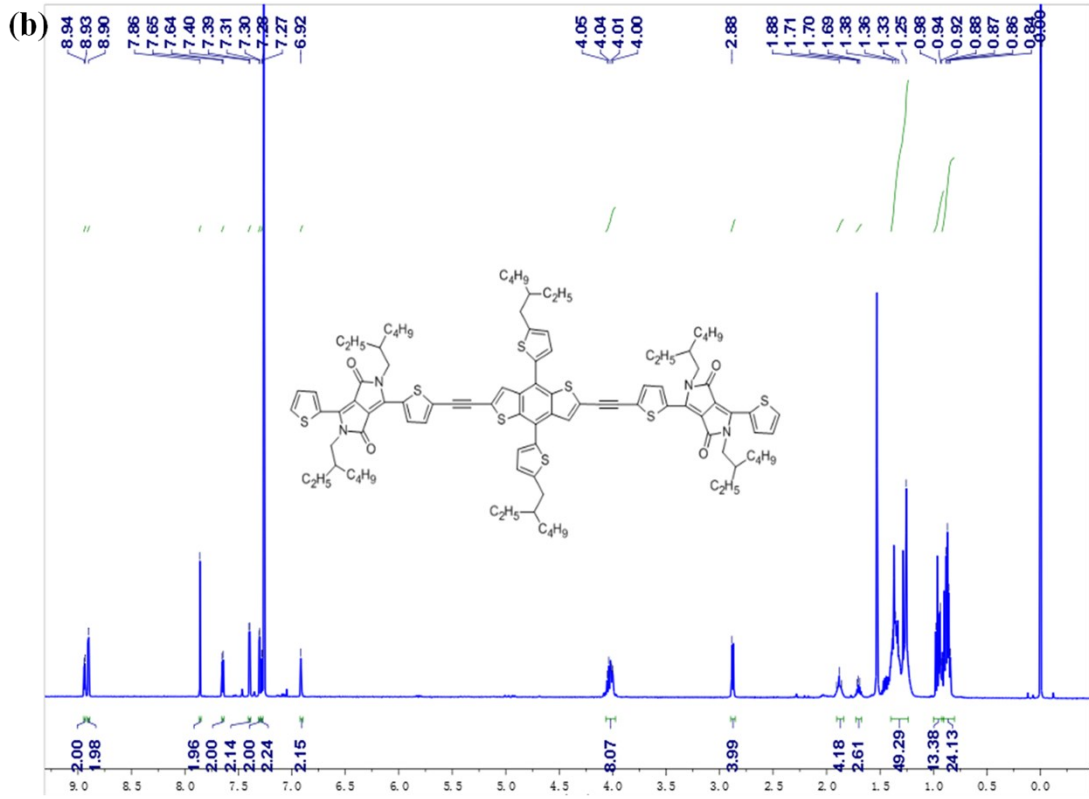

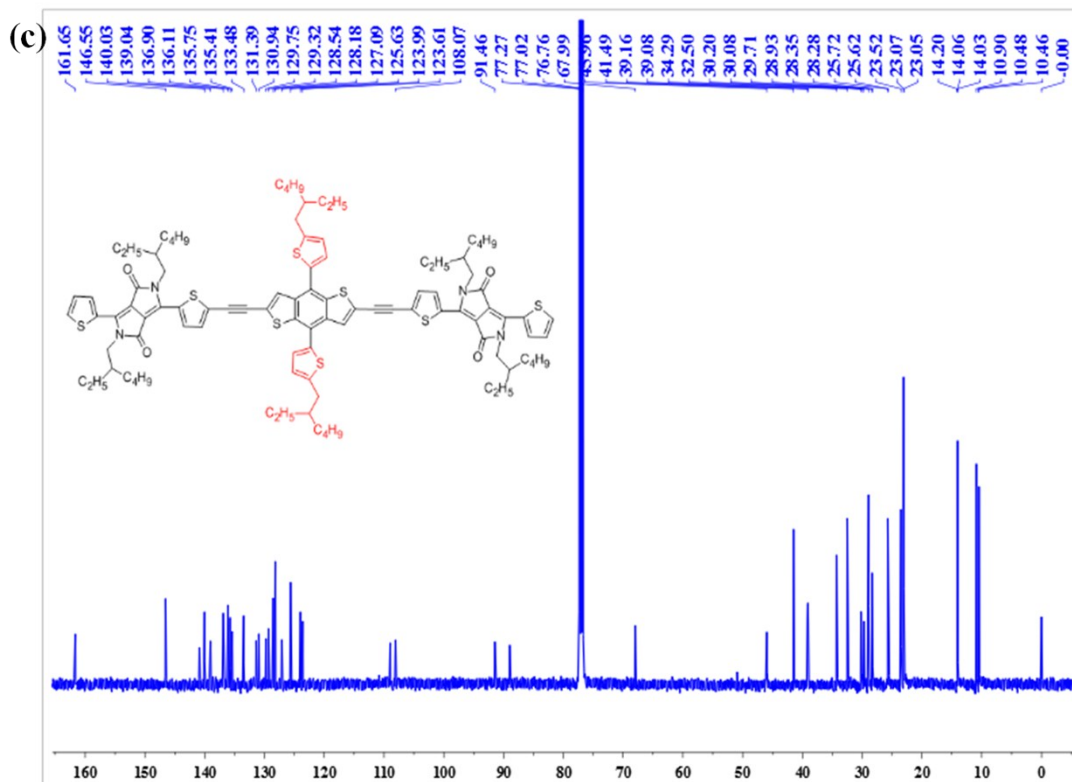

Figure S4.  $^1\text{H}$  NMR (a) and  $^{13}\text{C}$  NMR (c) spectra of DPP-E-BDT-T in  $\text{CDCl}_3$ .  $^1\text{H}$  NMR spectrum (b) of the sample after exposure to the light and air for two months.



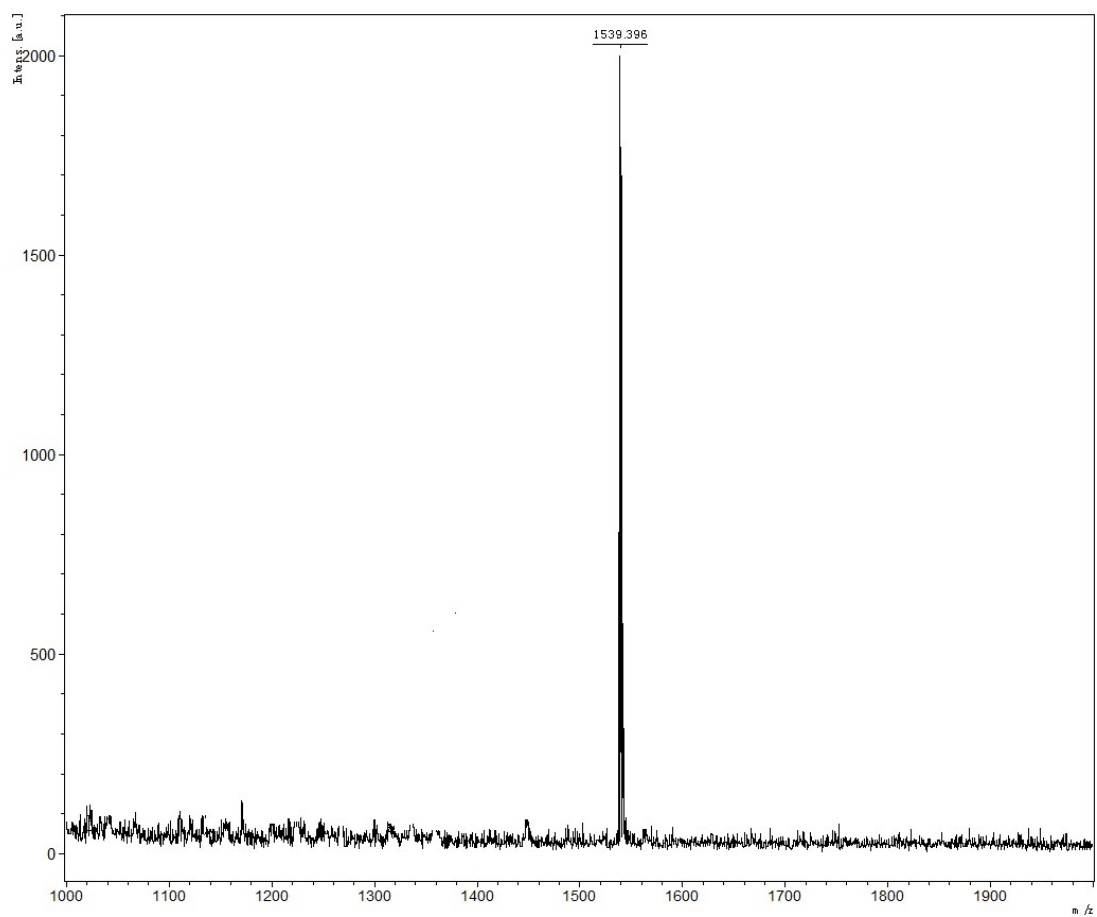

Figure S5. Mass (MALDI-TOF) spectrum of DPP-E-BDT.

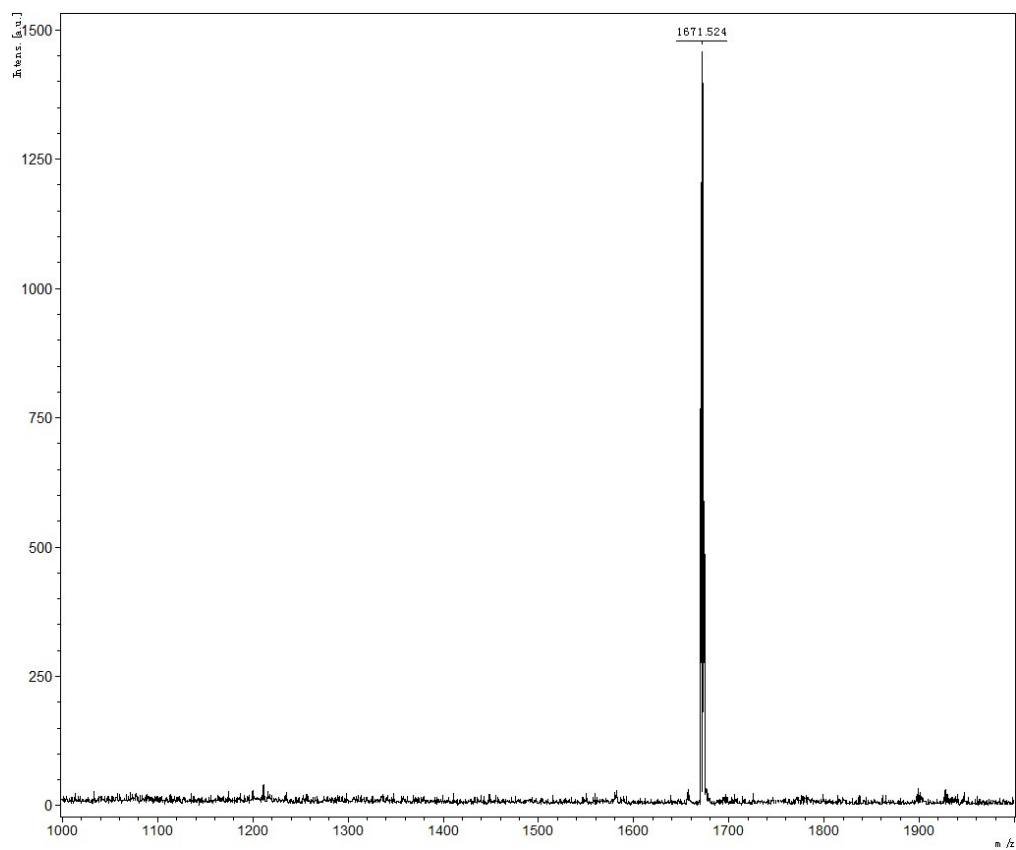

Figure S6. Mass (MALDI-TOF) spectrum of DPP-E-BDT-T.

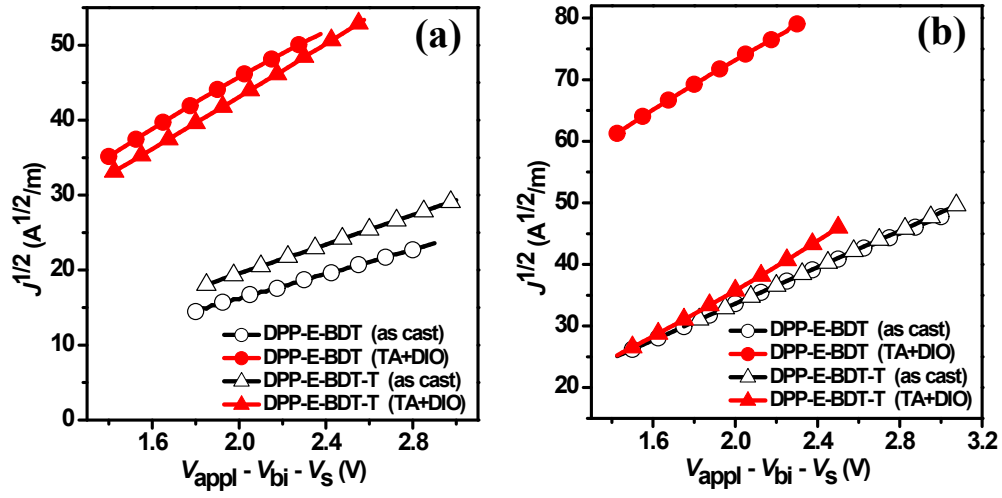

Figure S7. SCLC  $J^{1/2}$ - $V$  characteristics of DPP-E-BDT and DPP-E-BDT-T based active layers in hole-only (a) and electron-only (b) devices. Hole-only device: ITO/PEDOT:PSS/active layer/MoO<sub>3</sub>/Al; electron-only device: ITO/ZnO/active layer/PFN/Al.

Table S1. Photovoltaic performances of the OSCs with different D:A ratios, based on the as-cast active layer films.

| Donor       | D:A ratio | $V_{oc}$<br>(V) | $J_{sc}$<br>(mA/cm <sup>2</sup> ) | FF<br>(%) | PCE<br>(%) |
|-------------|-----------|-----------------|-----------------------------------|-----------|------------|
| DPP-E-BDT   | 2:1       | 0.84            | 5.59                              | 49.6      | 2.33       |
|             | 1:1       | 0.91            | 5.81                              | 56.1      | 2.97       |
|             | 1:2       | 0.81            | 4.23                              | 51.3      | 1.76       |
| DPP-E-BDT-T | 2:1       | 0.88            | 4.22                              | 32.9      | 1.22       |
|             | 1:1       | 0.98            | 5.92                              | 32.9      | 1.91       |
|             | 1:2       | 0.83            | 1.88                              | 31.8      | 0.50       |

Table S2. Comparison of photovoltaic performances of the OSCs based on active layers fabricated with chlorobenzene or CHCl<sub>3</sub> as the solvent, where 0.4 v% DIO and thermal annealing at 100 °C for 10 min were applied.

| Donor       | Solvent           | $V_{oc}$<br>(V) | $J_{sc}$<br>(mA/cm <sup>2</sup> ) | FF<br>(%) | PCE<br>(%) |
|-------------|-------------------|-----------------|-----------------------------------|-----------|------------|
| DPP-E-BDT   | Chlorobenzene     | 0.88            | 7.87                              | 60.4      | 4.19       |
|             | CHCl <sub>3</sub> | 0.92            | 7.45                              | 54.6      | 3.74       |
| DPP-E-BDT-T | Chlorobenzene     | 0.89            | 10.9                              | 73.6      | 7.12       |
|             | CHCl <sub>3</sub> | 0.89            | 9.46                              | 68.3      | 5.75       |
